# Supplementary material for: A novel clinical tool to classify facioscapulohumeral muscular dystrophy phenotypes
Source: J Neurol. 2016 Apr 28;263:1204–14. doi: 10.1007/s00415-016-8123-2 (PMC4893383; doi:10.1007/s00415-016-8123-2)
Supplement: Supplementary file 1 — Supplementary material 1 (PDF 221 kb) [file 415_2016_8123_MOESM1_ESM.pdf]

**Part A**

Referring Hospital: \_\_\_\_\_ Referring Physician: \_\_\_\_\_

Compilation Date: \_\_/\_\_/\_\_\_\_

Patient Initials: \_\_\_\_\_ Patient code: \_\_\_\_\_

Date of birth: \_\_/\_\_/\_\_\_\_ Sex:        ☐ M    ☐ F

Handedness:    ☐ Left    ☐ Right

Weight: \_\_\_\_\_ kg

Height: \_\_\_\_\_ cm

Family Ancestry - geographic origins:

Maternal: \_\_\_\_\_ Mother Surname: \_\_\_\_\_

Paternal: \_\_\_\_\_

Consanguinity: ☐ Yes    ☐ No

Current profession: \_\_\_\_\_ Since year: \_\_\_\_

*If you were previously employed:*

Previous profession(s) :

\_\_\_\_\_ From year: \_\_\_\_ to year \_\_\_\_

\_\_\_\_\_ From year: \_\_\_\_ to year \_\_\_\_

\_\_\_\_\_ From year: \_\_\_\_ to year \_\_\_\_

Highest degree:    ☐ University degree    ☐ High-school diploma    ☐ Primary school diploma    ☐ None

(years of education: \_\_\_\_\_)

**Clinical history**

Previous evaluation in other center(s): ☐ Yes ☐ No If yes, centre: (1) \_\_\_\_\_  
(2) \_\_\_\_\_

FSHD score at last clinical examination: \_\_ \_ Date: \_\_ / \_\_ / \_\_ \_ \_

**Comorbidities:**

Diabetes mellitus: ☐ Yes ☐ No ☐ Not evaluated

If Yes, ☐ type I ☐ type II Age at diagnosis: \_\_ \_

Therapy, Drugs :

\_\_\_\_\_ Dose: \_ \_ \_ \_ unit \_ \_ \_ \_ From year: \_ \_ \_ \_ to year \_ \_ \_ \_  
\_\_\_\_\_  
\_\_\_\_\_

Thyroid hormones alterations: ☐ Yes ☐ No ☐ Not evaluated

If Yes, ☐ hypothyroidism ☐ hyperthyroidism Age at diagnosis: \_\_ \_

Therapy, Drugs :

\_\_\_\_\_ Dose: \_ \_ \_ \_ unit \_ \_ \_ \_ From year: \_ \_ \_ \_ to year \_ \_ \_ \_  
\_\_\_\_\_

Hepatitis: ☐ Yes ☐ No ☐ Not evaluated

If Yes, ☐ HBV ☐ HCV ☐ Toxic Age at diagnosis: \_\_ \_

Therapy, Drugs :

\_\_\_\_\_ Dose: \_ \_ \_ \_ unit \_ \_ \_ \_ From year: \_ \_ \_ \_ to year \_ \_ \_ \_  
\_\_\_\_\_

*FSHD Comprehensive Clinical Evaluation Form (CCEF) –Evaluation Form*  
*Section 1*

Diagnosis of cancer:      ☐ Yes      ☐ No

If yes, specify: \_\_\_\_\_ Age at diagnosis: \_\_ \_\_

Therapy, Drugs :

\_\_\_\_\_ Dose: \_\_\_\_\_ unit \_\_\_\_\_ From year: \_\_\_\_\_ to year \_\_\_\_\_  
\_\_\_\_\_

Retinal vasculopathy:      ☐ Yes      ☐ No      ☐ Not evaluated

Sensorineural deafness:      ☐ Yes      ☐ No

Audiometry:      ☐ Altered      ☐ Normal      ☐ Not performed

Epilepsy:      ☐ Yes      ☐ No

Cognitive impairment:      ☐ Yes      ☐ No

**Other disease(s)**

Other diseases      ☐ Yes      ☐ No

If yes, specify: \_\_\_\_\_

\_\_\_\_\_  
\_\_\_\_\_

Previous trauma: joint, bone fractures: ☐ Yes      ☐ No      If yes, specify site and age\_\_ \_\_

\_\_\_\_\_

**Drugs:**

Statins:            ☐ Yes      ☐ No    If yes, Type: \_\_\_\_\_

Dose: \_\_\_\_\_ unit \_\_\_\_\_    From year: \_\_\_\_\_ to year \_\_\_\_\_

Others chronic treatments: ☐ Yes      ☐ No

If yes

Drug: \_\_\_\_\_ Dose: \_\_\_\_\_    From year: \_\_\_\_\_ to year \_\_\_\_\_

\_\_\_\_\_  
\_\_\_\_\_

**Reproductive History:**

Have you ever been pregnant?    ☐ Yes      ☐ No

Are you pregnant now?            ☐ Yes      ☐ No

How many times have you been pregnant:    \_\_ \_\_

Spontaneous abortion:            ☐ Yes      ☐ No      if yes, Number of spontaneous abortion: \_\_ \_\_

How many vaginal deliveries have you had? {Please count stillbirths as well as live births}: \_\_ \_\_

How many cesarean deliveries have you had? {Please count stillbirths as well as live births}: \_\_ \_\_

How many of the deliveries resulted in a live birth? : \_\_ \_\_

How old were you at the time of your first live birth? age \_\_ \_\_

How old were you at the time of your last live birth? age \_\_ \_\_

Prenatal diagnosis    ☐ Yes (N°\_\_\_\_\_)    ☐ No      If yes, result: \_\_\_\_\_

Modification of the disease after the pregnancy:    ☐ None      ☐ Worsening      ☐ Improvement

**Menopause:**            ☐ Yes      ☐ No    If yes, physiological menopause:    ☐ Yes    ☐ No    age \_\_ \_\_

Hormonal therapy:    ☐ Yes      ☐ No      Modification of the disease: ☐ None    ☐ Worsening    ☐ Improvement

**Physical activity:** Have you ever regularly played a sport? ☐ Yes ☐ No

If yes, report the two most played sports:

Sport (1): \_\_\_\_\_ ☐ Professional ☐ Amateur From age: \_\_ \_\_ to age \_\_ \_\_

Modification of the disease: ☐ None ☐ Worsening ☐ Improvement

Sport (2): \_\_\_\_\_ ☐ Professional ☐ Amateur From age: \_\_ \_\_ to age \_\_ \_\_

Modification of the disease: ☐ None ☐ Worsening ☐ Improvement

---

---

---

**Physiokinesitherapy (PKT):** ☐ Yes ☐ No

If yes, Duration of PKT treatment: From year: \_\_ \_\_ \_\_ \_\_ to year \_\_ \_\_ \_\_ \_\_

Modification of the disease: ☐ None ☐ Worsening ☐ Improvement

**Surgery:** ☐ Yes ☐ No

If yes, operation (1): \_\_\_\_\_ year: \_\_ \_\_ \_\_ \_\_

Anesthesia: ☐ General ☐ Local ☐ Epidural

Modification of the disease: ☐ None ☐ Worsening ☐ Improvement

If yes, operation (2): \_\_\_\_\_ year: \_\_\_\_\_

Anesthesia: ☐ General ☐ Local ☐ Epidural

Modification of the disease: ☐ None ☐ Worsening ☐ Improvement

---

---

**Family history** (*information from at least three generations should be collected*):

“Was/is any of your relatives wheelchair bound?”

“Did/does any of your relatives have a posture like yours?”

“Was any of your relatives sleeping with half-open eyes?”

Other considerations \_\_\_\_\_

\_\_\_\_\_

**(pedigree attached)**

**Part B      NEUROLOGICAL EXAMINATION**

**Age at Onset of motor impairment**

**Subjective age at onset** (when subject has noticed the appearance of motor impairment in his/her daily activities): \_\_\_\_\_ years old

Site of muscle weakness reported by patient at onset

Muscle group:

Facial muscles:            ☐ Yes   ☐ No

Shoulder girdle muscles: ☐ Yes   ☐ No

Abdominal muscles:    ☐ Yes   ☐ No

Distal lower limb muscles: ☐ Yes   ☐ No

Pelvic girdle muscles:   ☐ Yes   ☐ No

Distal upper limb muscles: ☐ Yes   ☐ No

Asymmetry at onset:    ☐ Yes   ☐ No

If yes, ☐ Right   ☐ Left

Triggering events        ☐ Yes   ☐ No

If yes, event: (1) \_\_\_\_\_

(2) \_\_\_\_\_

**Objective evaluation of age at onset** by specific questions:

Have your relatives never noticed that you were sleeping with half-open eyes? ☐ Yes   ☐ No

If yes, since age \_\_\_\_\_

Can you drink with a straw? ☐ Yes   ☐ No

If no, since what age have you been unable to drink with a straw? \_\_\_\_\_

Can you to puff your cheeks? ☐ Yes   ☐ No

If no, since what age have you been unable to puff your cheeks ? \_\_\_\_\_

Have you always been able to whistle? ☐ Yes   ☐ No

If no, since age \_\_\_\_\_

Have you noticed the appearance of winged scapula? ☐ Yes   ☐ No

If yes, since age \_\_\_\_\_

Have you ever noticed thinness of upper arms or a dropped shoulder? ☐ Yes   ☐ No

If yes, since age \_\_\_\_\_

Have you ever noticed asymmetry of the mouth or smile when looking in a mirror or in past photographs from childhood? ☐ Yes   ☐ No

If yes, since age \_\_\_\_\_

Other observations: \_\_\_\_\_

Duration (years) from onset\_\_\_\_\_

Recurrent/chronic pain:    ☐ Yes    ☐ No    If yes, since age \_\_ \_\_

Specify location\_\_\_\_\_

Precocious muscle fatigue during the common daily activities,before the onset of muscle impairment:

☐ Yes    ☐ No    If yes, since age \_\_ \_\_

Specify location\_\_\_\_\_

Other observations    ☐ Yes    ☐ No

---

**Face:**

Presence of:

Widened palpebral fissures: ..☐ Yes        ☐ No

Puckered lips:    ☐ Yes        ☐ No

Horizontal smile:    ☐ Yes        ☐ No

Orbiculari oris hypokinesia during speech:    ☐ Yes        ☐ No

Dysarthria:    ☐ Yes        ☐ No

Orbicularis oculi evaluation:    ☐ Normal (able to close heavily eyes)

☐ Partial (able to close eyes but incapable to close heavily eyes)

☐ Unable (unable to completely close eyes)

Ability to protrude lips:    ☐ Normal        ☐ Partial        ☐ Unable

Ability to puff out cheeks (against no resistance):    ☐ Normal        ☐ Partial        ☐ Unable

Asymmetric involvement of facial muscle:    ☐ Yes        ☐ No

if yes, specify side\_\_\_\_\_

**Scapular girdle:**

Ability to abduct arms:    ☐ Whole (180°)

☐ Complete but abnormal (patient can rise arms above head but only  
by flexing the elbow or using the accessory muscle)

☐ Incomplete: >45° but <180°    (specify if: ☐ ≥90° or    ☐ <90°)

☐ Incomplete: ≤45°

**Pelvic girdle:**

- Ability to climb 4 stairs:
- ☐ Without support
  - ☐ Without support but abnormally
  - ☐ With support (since age\_\_ \_\_)
  - ☐ Unable (since age\_\_ \_\_)

- Ability to walk:
- ☐ Without support
  - ☐ With support (since age\_\_ \_\_)
  - ☐ Unable (since age\_\_ \_\_)

- Gait:
- ☐ Normal
  - ☐ Waddling
  - ☐ Hyperlordotic
  - ☐ Steppage

- Ability to stand up from a chair:
- ☐ Without support
  - ☐ With support ( since age \_\_ \_\_ )
  - ☐ Unable (since age \_\_ \_\_ )

- Ability to rise from the floor:
- ☐ Without support
  - ☐ With support ( since age \_\_ \_\_ )
  - ☐ Unable (since age \_\_ \_\_ )

- Use of wheelchair:
- ☐ Not necessary
  - ☐ With manual control
  - ☐ With electric control
  - ☐ Bed bound

**Legs:**

- Ability to walk on tiptoes and/or heels:
- ☐ Normal
  - ☐ On tiptoes only
  - ☐ On heels only
  - ☐ Unable

- Beevor's sign:**
- ☐ Positive
  - ☐ Negative

**Part C**

*Medical Research Council (MRC) score:*

Scores range from 0 to 5, with .5 increments (e.g. 3, 3.5, 4, 4.5, etc)

| <b>MUSCLE</b>                       | <b>RIGHT<br/>MRC score</b> | <b>LEFT<br/>MRC score</b> | <b>ATROPHY<br/>Yes (right or left)<br/>/no</b> |
|-------------------------------------|----------------------------|---------------------------|------------------------------------------------|
| Extrarotator muscles of upper limb* |                            |                           |                                                |
| Triceps*                            |                            |                           |                                                |
| Biceps*                             |                            |                           |                                                |
| Common finger extensors*            |                            |                           |                                                |
| Wrist extensors*                    |                            |                           |                                                |
| Long fingers flexors*               |                            |                           |                                                |
| Wrist flexors*                      |                            |                           |                                                |
| Gluteus maximus                     |                            |                           |                                                |
| Iliopsoas                           |                            |                           |                                                |
| Biceps femoris                      |                            |                           |                                                |
| Quadriceps                          |                            |                           |                                                |
| Triceps surae                       |                            |                           |                                                |
| Tibialis anterior                   |                            |                           |                                                |

(\* Muscles to be considered for FSHD score “Upper limbs involvement”)

Strength of neck extensors muscles: MRC score \_\_\_\_\_

Weakness of pectoralis muscles:    ☐ Yes    ☐ No                      If yes, ☐ Right    ☐ Left

Pectoralis muscles atrophy:            ☐ Yes    ☐ No                      If yes, ☐ Right    ☐ Left

**PRESENCE OF FOLLOWING TYPICAL FEATURES:**

Scapular winging at rest:    ☐ Yes    ☐ No

(if yes, specify:      ☐ Symmetric winging, or      ☐ Asymmetric winging ☐ > right; ☐ > left)

Scapular winging on attempted shoulder abduction or forward flexion: ☐ Yes ☐ No

(if yes, specify:      ☐ Symmetric winging, or      ☐ Asymmetric winging ☐ > right; ☐ > left)

Horizontal clavicles: ☐ Yes ☐ No

Forward sloping of shoulders at rest: ☐ Yes ☐ No

Atrophy of pectoral muscles/ axillary creases:      ☐ Yes (☐ > right; ☐ > left)      ☐ No

Sunken or flattened appearance of the chest:      ☐ Yes      ☐ No

“Poly-hill sign” with neck, shoulders, and arms observed from behind in

fullest possible abduction (70–90°), with external rotation of the shoulders : ☐ Yes ☐ No

Hyperlordosis:   ☐ Yes   ☐ No

Orbiculari oris hypokinesia during speech:    ☐ Yes    ☐ No

**PRESENCE OF UNCOMMON FEATURES:**

Myotonic phenomenon: ☐ Yes ☐ No

Rippling phenomenon: ☐ Yes ☐ No

Eyelid ptosis: ☐ Yes ☐ No

Extra-ocular weakness:                    ☐ Yes        ☐ No

Pharyngeal and lingual muscle weakness (persistent dysphagia):      ☐ Yes      ☐ No

Bent syndrome: ☐ Yes ☐ No

Early contractures: ☐ Yes ☐ No

(If yes, specify site \_\_\_\_\_)

Dropped head: ☐ Yes ☐ No

Pes cavus: ☐ Yes ☐ No

Myoglobinuria: ☐ Yes ☐ No

Ogival palatus: ☐ Yes ☐ No

Others: \_\_\_\_\_

**Creatine phosphokinase (CPK)** (value of two blood assays separated by at least one month):

- ☐ Normal range
- ☐ < 4x normal value (<1000 U/L)
- ☐ > 4x normal value (>1000 U/L)

**Instrumental evaluation**

Cardiac involvement (ECG, echocardiogram):

Last ECG's report \_\_\_\_\_ (date: \_\_/\_\_/\_\_)

Last echocardiogram's report \_\_\_\_\_ (date: \_\_/\_\_/\_\_)

Electromyographic pattern of four limbs (detail the examined muscles) (date: \_\_/\_\_/\_\_)

- ☐ Myopathic pattern    (☐ Proximal ;    ☐ Distal)
- ☐ Neurogenic pattern    (☐ Proximal ;    ☐ Distal)
- ☐ Mixed pattern        (☐ Proximal ;    ☐ Distal)

Electroneurography of four limbs (detail the examined nerves) (date: \_\_/\_\_/\_\_)

- ☐ Normal    ☐ Abnormal

Report of last pulmonary function tests (FVC, MIP, MEP, Cough peak flow) (date \_\_/\_\_/\_\_):

\_\_\_\_\_  
\_\_\_\_\_

Report of muscle biopsy (if available; please specify date and biopsied muscle)\*: (date \_\_/\_\_/\_\_)

Biopsied muscle: \_\_\_\_\_

Report: \_\_\_\_\_

\_\_\_\_\_

Other genetic test previously performed (if available): \_\_\_\_\_

\_\_\_\_\_

\*(please attach reports)

Name of the Examiner: \_\_\_\_\_

**I - Facial weakness**

0 - no weakness

1 - moderate weakness;

partial ability to do at least one of the following tasks:

- to close eyes
- to protrude lips
- to puff out cheeks

2 - severe weakness;

unable to do at least one of the following tasks:

- to close eyes
- to protrude lips
- to puff out cheeks

**II - Scapular girdle involvement**

0 - no involvement

1 - mild involvement with no limitation of arm abduction

2 - arm abduction > 45°

3 - arm abduction < 45°

**III - Upper limbs involvement \***

0 - no involvement

1 - at least two muscles affected with MRC >3

2 - at least two muscles with MRC ≤ 3

*\*The following 4 muscles will be assessed on each side: 1. triceps; 2. biceps; 3. common finger extensors and wrist extensors; 4. long finger flexors and wrist extensors. Only the weaker muscles will be considered for evaluation.*

**IV - Legs involvement**

The ability to walk on tiptoes and heels will be assessed on each side:

0 - no involvement

1 - unable to walk on tiptoes or heels (only one task impaired)

2 - unable to walk on tiptoes and heels (two tasks impaired)

**V - Pelvic girdle involvement**

0 - no involvement

1 - able to walk and to climb stairs without support but abnormally/ because of posterior leg muscle hypotrophy

2 - able to walk unaided, to climb stairs or to stand up from a chair with support

3 - able to walk unaided but unable to stand up from a chair or to climb stairs without support/ more than 12 seconds

4 - able to walk with support

5 - wheelchair bound

**VI - Abdominal muscle involvement**

0 - no involvement

1 - presence of Beevor's sign

**FSHD clinical score:** \_\_\_\_\_

|                                                                   | TYPICAL<br>FEATURES                                                                                                                                                                                                                                                                                                                                                                                                          | UNCOMMON<br>FEATURES                                                                                                                                                                                                                                                                                                                                                                                                                                                                 |
|-------------------------------------------------------------------|------------------------------------------------------------------------------------------------------------------------------------------------------------------------------------------------------------------------------------------------------------------------------------------------------------------------------------------------------------------------------------------------------------------------------|--------------------------------------------------------------------------------------------------------------------------------------------------------------------------------------------------------------------------------------------------------------------------------------------------------------------------------------------------------------------------------------------------------------------------------------------------------------------------------------|
| <b>1. ONSET OF MUSCLE WEAKNESS</b>                                | <input type="checkbox"/> Facial weakness of orbicularis oculi or oris<br><input type="checkbox"/> Scapular weakness with altered ability to abduct arms<br><input type="checkbox"/> Humeral muscles (biceps/triceps)                                                                                                                                                                                                         | <input type="checkbox"/> Distal lower limbs onset with triceps surae weakness<br><input type="checkbox"/> Distal upper limbs onset<br><input type="checkbox"/> Pelvic girdle onset                                                                                                                                                                                                                                                                                                   |
| <b>2. AXIAL MUSCLES INVOLVEMENT</b>                               | <input type="checkbox"/> Hyperlordosis<br><input type="checkbox"/> Beevor's sign                                                                                                                                                                                                                                                                                                                                             | <input type="checkbox"/> Camptocormia<br><input type="checkbox"/> Dropped head                                                                                                                                                                                                                                                                                                                                                                                                       |
| <b>3. FACIAL INVOLVEMENT</b>                                      | <input type="checkbox"/> Weakness of Orbicularis oculi (facial score $\geq 1$ )<br><input type="checkbox"/> Weakness of Orbicularis oris (facial score $\geq 1$ )                                                                                                                                                                                                                                                            | <input type="checkbox"/> Weakness of extra-ocular muscles<br><input type="checkbox"/> Weakness of masticatory muscles (persistent dysphagia)                                                                                                                                                                                                                                                                                                                                         |
| <b>4. SCAPULAR GIRDLE INVOLVEMENT</b>                             | <input type="checkbox"/> Impairment of upper limb abduction with winged scapula or limitation of forward flexion (scapular FSHD score $\geq 1$ )                                                                                                                                                                                                                                                                             | <input type="checkbox"/> Isolated distal upper limb muscle weakness<br><input type="checkbox"/> Impairment of arms abduction ( $<90^\circ$ ) without winged scapula at rest and/or on attempted shoulder abduction or forward flexion                                                                                                                                                                                                                                                |
| <b>5. PELVIC GIRDLE INVOLVEMENT</b>                               | -----                                                                                                                                                                                                                                                                                                                                                                                                                        | <input type="checkbox"/> Isolated and/or prevailing pelvic girdle muscle weakness                                                                                                                                                                                                                                                                                                                                                                                                    |
| <b>6. LOWER LIMBS INVOLVEMENT</b>                                 | <input type="checkbox"/> Weakness of tibialis anterior muscles weakness                                                                                                                                                                                                                                                                                                                                                      | <input type="checkbox"/> Early gastrocnemius and/or soleus atrophy/weakness                                                                                                                                                                                                                                                                                                                                                                                                          |
| <b>7. BLOOD CPK LEVEL</b><br>(at least two samples 1 month apart) | <input type="checkbox"/> Normal range<br><input type="checkbox"/> $< 4 \times$ normal value ( $<1000$ U/L)                                                                                                                                                                                                                                                                                                                   | <input type="checkbox"/> Value $> 4 \times$ normal value ( $>1000$ U/L)                                                                                                                                                                                                                                                                                                                                                                                                              |
| <b>8. OTHER SIGNS</b>                                             | <input type="checkbox"/> Shoulders winging on attempted shoulder abduction or forward flexion<br><input type="checkbox"/> Horizontal clavicles<br><input type="checkbox"/> Forward sloping of the shoulders at rest<br><input type="checkbox"/> Sunken or flattened appearance of the chest<br><input type="checkbox"/> Atrophy of pectoralis muscles<br><input type="checkbox"/> Orbicularis oris hypokinesia during speech | <input type="checkbox"/> Myotonic phenomenon<br><input type="checkbox"/> Rippling<br><input type="checkbox"/> Eyelid ptosis<br><input type="checkbox"/> Extra-ocular muscle weakness<br><input type="checkbox"/> Early muscle contractures<br><input type="checkbox"/> Cardiomyopathy<br><input type="checkbox"/> Early respiratory insufficiency (Non Invasive Ventilation, NIV; FSHD score $<12$ )<br><input type="checkbox"/> Pes cavus<br><input type="checkbox"/> Myoglobinuria |

**Importantly:** Indicate the presence of comorbidities / results of previous injuries / illnesses that can possibly affect the neurological examination: \_\_\_\_\_

**Extra-muscular involvement:** ☐ hearing loss, ☐ epilepsy, ☐ retinal involvement, ☐ cognitive impairment

## CATEGORY A

### Category A1

Severe facial weakness (unable **both** to close eyes **and** to protrude lips) + impairment of upper limb abduction with winged scapula (scapular FSHD score  $\geq 1$ ) + absence of uncommon features

### Category A2

Facial weakness (upper **and** lower facial weakness) + impairment of upper limb abduction with winged scapula (scapular FSHD score  $\geq 1$ ) + absence of uncommon features

### Category A3

Facial weakness (upper **or** lower facial weakness) + impairment of upper limb abduction with winged scapula (scapular FSHD score  $\geq 1$ ) + absence of uncommon features

## CATEGORY B

### Category B1

Impairment of upper limb abduction with winged scapula (scapular FSHD score  $\geq 1$ ), no facial weakness + absence of uncommon features

### Category B2

Facial weakness (facial FSHD score  $\geq 1$ ), no impairment of upper limb abduction + absence of uncommon features

## CATEGORY C

### Category C1

Subject with presence of at least one typical sign + FSHD score =0

### Category C2

Subject without signs of muscle weakness + FSHD score =0

## CATEGORY D

### Category D1

Subject fulfilling criteria of categories A1, A2, A3, B1, B2 + at least one uncommon feature

### Category D2

-Subject fulfilling criteria of categories C1 or C2 + at least one uncommon feature  
-Subject no fulfilling criteria of any of the above categories

---
