# Supplementary material for: A novel clinical tool to classify facioscapulohumeral muscular dystrophy phenotypes
Source: J Neurol. 2016 Apr 28;263:1204–14. doi: 10.1007/s00415-016-8123-2 (PMC4893383; doi:10.1007/s00415-016-8123-2)
Supplement: Supplementary file 2 — Supplementary material 2 (PDF 51 kb) [file 415_2016_8123_MOESM2_ESM.pdf]

**Supplementary table 1.** Characteristics of the 56 FSHD patients enrolled in the inter-rater reliability study.

|                                   |               | <b>Patients</b> |                   |
|-----------------------------------|---------------|-----------------|-------------------|
|                                   |               | <b>Number</b>   | <b>Percentage</b> |
|                                   |               | <b>(n)</b>      | <b>(%)</b>        |
| <b>Sex</b>                        | <i>Male</i>   | 27              | 48.2              |
|                                   | <i>Female</i> | 29              | 51.8              |
| <b>Age at examination (years)</b> | <i>14-40</i>  | 19              | 33.9              |
|                                   | <i>41-60</i>  | 20              | 35.7              |
|                                   | <i>61-74</i>  | 17              | 30.4              |
| <b>FSHD score</b>                 | <i>0-5</i>    | 28              | 50.0              |
|                                   | <i>6-10</i>   | 21              | 37.5              |
|                                   | <i>11-15</i>  | 7               | 12.5              |
| <b>D4Z4 allele size (U)</b>       | <i>1-3</i>    | 7               | 12.5              |
|                                   | <i>4-6</i>    | 38              | 67.9              |
|                                   | <i>7-8</i>    | 8               | 14.3              |
|                                   | <i>9-10</i>   | 3               | 5.4               |
